# Supplementary material for: Structural and morphological tuning of iron oxide polymorphs by ECR plasma-assisted thermal oxidation
Source: Royal Society of Chemistry journal article supplement (doi:10.1039/d0ra05410k), 2020-01-01
Supplement: d0ra05410k1.pdf [file d0ra05410k1.pdf]

Supplementary data

Structural and morphological tuning of iron oxide polymorphs by ECR plasma assisted thermal oxidation

Supriya E. More<sup>a</sup>, Suyog A. Raut<sup>a</sup>, S. Premkumar<sup>a,b</sup>, Somanath R Bhopale<sup>a</sup>, Sudha V. Bhoraskar<sup>a</sup>, Mahendra A. More<sup>a</sup>, Vikas L. Mathe<sup>a\*</sup>

<sup>a</sup>Department of Physics, Savitribai Phule Pune University, Ganeshkhind, Pune 411007, Maharashtra, India.

<sup>b</sup>Armament Research and Development Establishment, Pune 411021, Maharashtra, India.

(Email address: [vmathe@physics.unipune.ac.in](mailto:vmathe@physics.unipune.ac.in) / [vikasmathe@gmail.com](mailto:vikasmathe@gmail.com) )

**1 X-ray Photoelectron spectroscopy:**

Supplementary Table 1: XPS analysis of the Fe2p peaks fitted using XPSPEAK software showing fitted peak position (binding energy), FWHM and area under the curve for M-S1, M-S2 and M-S3 films.

| M-S1 | Fe2p      |        |        |        |        |        |        |        |        |        |        |
|------|-----------|--------|--------|--------|--------|--------|--------|--------|--------|--------|--------|
|      | Peak (eV) | 709.61 | 710.76 | 712.23 | 713.94 | 718.84 | 723.26 | 724.55 | 725.92 | 727.42 | 733.13 |
|      | FWHM      | 1.34   | 1.69   | 1.95   | 2      | 4.96   | 1.95   | 1.95   | 1.95   | 1.95   | 3.45   |
|      | Area      | 3572   | 6006   | 4826   | 3678   | 1193   | 2902   | 2974   | 2544   | 1215   | 1967   |
| M-S2 | Fe2p      |        |        |        |        |        |        |        |        |        |        |
|      | Peak (eV) | 709.49 | 710.38 | 711.59 | 713.1  | 719.2  | 723.17 | 724.57 | 726.07 | 728.21 | 733.75 |
|      | FWHM      | 1.58   | 1.58   | 1.68   | 1.95   | 2.38   | 2      | 2      | 2      | 2      | 4.06   |
|      | Area      | 2253   | 2860   | 2098   | 1783   | 798    | 1543   | 1886   | 944    | 392    | 1490   |
| M-S3 | Fe2p      |        |        |        |        |        |        |        |        |        |        |
|      | Peak (eV) | 709.71 | 711.14 | 712.72 | 714.17 | 718.63 | 723.1  | 724.34 | 725.64 | 727.11 | 732.92 |
|      | FWHM      | 1.71   | 1.94   | 1.72   | 2      | 3.67   | 2      | 2      | 2      | 2      | 4.01   |
|      | Area      | 9084   | 11625  | 4697   | 3053   | 4073   | 5379   | 5363   | 3047   | 1286   | 2865   |

Supplementary Table 2: XPS analysis of the Fe2p peaks fitted using XPSPEAK software showing fitted peak position (binding energy), FWHM and area under the curve for N-S0, N-S1, N-S2 and N-S3 films.

| N-S0 | Fe2p      |        |        |        |        |        |        |        |        |        |
|------|-----------|--------|--------|--------|--------|--------|--------|--------|--------|--------|
|      | Peak (eV) | 709.96 | 711.55 | 713.43 | 719.15 | 724.29 |        |        |        |        |
|      | FWHM      | 2      | 2      | 2      | 2      | 2.5    |        |        |        |        |
|      | Area      | 575    | 345    | 139    | 130    | 500    |        |        |        |        |
| N-S1 | Fe2p      |        |        |        |        |        |        |        |        |        |
|      | Peak (eV) | 708.95 | 710.66 | 712.19 | 713.74 | 722.15 | 723.83 | 725.38 | 727.18 | 733.48 |
|      | FWHM      | 2      | 2      | 2      | 1.94   | 2      | 2      | 2      | 2      | 2      |
|      | Area      | 4112   | 10193  | 6359   | 3350   | 2261   | 4503   | 3563   | 1324   | 1000   |
| N-S2 | Fe2p      |        |        |        |        |        |        |        |        |        |
|      | Peak (eV) | 709.53 | 710.79 | 712.40 | 713.97 | 719.3  | 723.38 | 724.72 | 726.35 | 733.55 |
|      | FWHM      | 2      | 2      | 2.15   | 2      | 2.4    | 2      | 2      | 2      | 3.14   |
|      | Area      | 3329   | 8452   | 6298   | 6298   | 1576   | 3568   | 3951   | 2318   | 840    |
| N-S3 | Fe2p      |        |        |        |        |        |        |        |        |        |
|      | Peak (eV) | 709.54 | 710.66 | 712.09 | 713.76 | 719.04 | 723.46 | 724.77 | 726.21 | 733.24 |
|      | FWHM      | 1.53   | 1.77   | 1.91   | 2      | 3.2    | 2      | 2      | 2      | 2.93   |
|      | Area      | 3091   | 7240   | 5055   | 3822   | 3127   | 3548   | 3784   | 2216   | 694    |

## 2 Field Emission Scanning Electron Microscopy (FE-SEM):

**Supplementary Fig. 1** includes FE-SEM micrographs of the films M-S1, M-S2, N-S0, N-S1, and N-S3 processed by PATO. The cauliflower like morphology is seen for the M-S1 film and agglomerated sheet like morphology for M-S2 film. Here, N-S0 film shows irregular morphology with wide size distribution. Film N-S1 show grain growth with respect to N-S0 and the grains possesses small pores in it. N-S3 consists of mixed morphology in terms of size distribution as well as shapes.

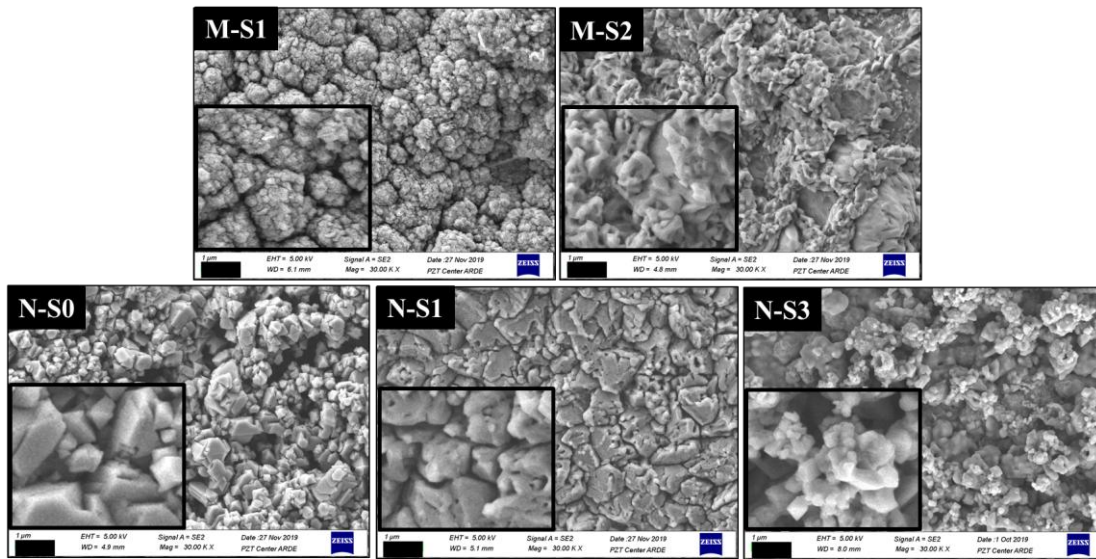

Supplementary Figure 1. The Field emission - Scanning Electron Micrographs (FE-SEM) recorded after PATO processed for M-S1/S2 and N-S0/1/3 films kept at different processing condition with a 1 μm scale and magnification of x30000. (Every inset shows magnified micrograph of respective sample surface)
